### PATH-10. EFFECTS OF 19Q-LOSS IN IDH-MUTATED ASTROCYTOMAS ON BETTER PROGNOSIS AND OLIGODENDROGLIOMA-LIKE MORPHOLOGY

Ryohei Otani<sup>1</sup>, Takeo Uzuka<sup>2</sup>, Fumi Higuchi<sup>2</sup>, Hadzki Matsuda<sup>2</sup>, Shota Tanaka<sup>3</sup>, Akitake Mukasa<sup>4</sup>, Phyo Kim<sup>2</sup>, and Keisuke Ueki<sup>2</sup>;  
<sup>1</sup>Department of Neurosurgery, Tokyo Metropolitan Komagome Hospital, Tokyo, Japan, <sup>2</sup>Department of Neurosurgery, Dokkyo Medical University, Shimotsuga, Japan, <sup>3</sup>Department of Neurosurgery, Faculty of Medicine, The University of Tokyo, Tokyo, Japan, <sup>4</sup>Department of Neurosurgery, Graduate School of Medical Sciences, Kumamoto University, Kumamoto, Japan

We previously reported that there was a subgroup of *IDH*-mutated astrocytomas harboring only 19q-loss showing oligodendroglioma-like morphology and significantly longer overall survival (OS) compared with 19q-intact astrocytomas. To further explore the biological characteristics of this possible subgroup and obtain insight into the mechanism of their clinical behavior, we compared gene expression pattern between five 19q-loss and five 19q-intact *IDH*-mutated astrocytomas by microarray analysis. Comparing expression level of each gene between 19q-loss and 19q-intact astrocytomas, 136 up-regulated genes and 203 down-regulated genes were extracted. Gene expression patterns of 19q-loss astrocytomas were partially different from that of 19q-intact astrocytomas. More down-regulated genes distributed on 19q and 4p, and more up-regulated genes distributed on 4q. Multiple genes associated with stem cell maintenance were down-regulated in 19q-loss astrocytomas, and genes associated with glioma progression were differentially expressed. Comparing expression patterns among 19q-loss astrocytomas and other *IDH*-mutant glioma subgroups using TCGA datasets by t-SNE analysis revealed that expression pattern of 19q-loss astrocytomas did not shift to that of oligodendrogliomas with 1p/19q codeletion but were a subgroup in astrocytomas. These results indicated that 19q-loss in astrocytomas was an acquired event different from 1p/19q codeletion in oligodendrogliomas, and better prognosis morphological features in 19q-loss astrocytomas were derived from differentially expressed genes associated with stem cell maintenance and glioma progression.

### PATH-11. PROGNOSTIC SIGNIFICANCE OF EPIGENETIC SUBTYPES AND CPGs ASSOCIATED WITH PROGRESSION TO G-CIMP LOW IN THE EORTC RANDOMIZED PHASE III INTERGROUP CATNON

C. Mircea S. Tesileanu<sup>1</sup>, Martin van den Bent<sup>1</sup>, Thais Sabedot<sup>2</sup>, Marc Sanson<sup>3</sup>, Alba Brandes<sup>4</sup>, Wolfgang Wick<sup>5</sup>, Paul Clement<sup>6</sup>, Sarah Erridge<sup>7</sup>, Michael Vogelbaum<sup>8</sup>, Anna Nowak<sup>9</sup>, Jean Baurain<sup>6</sup>, Warren Mason<sup>10</sup>, Helen Wheeler<sup>11</sup>, Michael Weller<sup>12</sup>, Iris de Heer<sup>1</sup>, Hendrikus Dubbink<sup>1</sup>, Johan M. Kros<sup>1</sup>, Kenneth Aldape<sup>13</sup>, Pieter Wesseling<sup>14</sup>, Vassilis Golinopoulos<sup>15</sup>, Thierry Gorlia<sup>15</sup>, Brigitta Baumert<sup>16</sup>, Houtan Noshmehr<sup>17</sup>, and Pim French<sup>1</sup>; <sup>1</sup>Erasmus MC Cancer Institute, Rotterdam, Netherlands, <sup>2</sup>Henry Ford Health System, Detroit, MI, USA, <sup>3</sup>Sorbonne Universités UPMC, Paris, France, <sup>4</sup>AUSL-IRCCS Scienze Neurologiche, Bologna, Italy, <sup>5</sup>University of Heidelberg and DKFZ, Heidelberg, Germany, <sup>6</sup>UZ Leuven, Leuven, Belgium, <sup>7</sup>Western General Hospital, Edinburgh, United Kingdom, <sup>8</sup>H Lee Moffitt Cancer Center, Tampa, FL, USA, <sup>9</sup>Sir Charles Gairdner Hospital, Nedlands, WA, Australia, <sup>10</sup>Princess Margaret Cancer Centre, University of Toronto, Toronto, ON, Canada, <sup>11</sup>Department of Medical Oncology, Northern Sydney Cancer Centre, Royal North Shore Hospital, Sydney, NSW, Australia, <sup>12</sup>UniversitätsSpital Zürich - Klinik für Neurologie, Zurich, Switzerland, <sup>13</sup>National Cancer Institute, National Institute of Health, Bethesda, MD, USA, <sup>14</sup>Amsterdam University Medical Center, Amsterdam, Netherlands, <sup>15</sup>EORTC, Brussels, Belgium, <sup>16</sup>Kantonsspital Graubünden, Chur, Switzerland, <sup>17</sup>Henry Ford Health System, Detroit, MI, USA

**BACKGROUND:** Uncontrolled studies have suggested that methylation-based epigenetic subtypes can be used for prognostication of glioma. We used the prospective randomized CATNON trial to validate the clinical relevance of these epigenetic subtypes. **METHODS:** The phase III CATNON trial randomized 751 adult patients with newly diagnosed 1p/19q non-codeleted anaplastic glioma to 59.4 Gy radiotherapy +/- concurrent and/or adjuvant TMZ. CNV data and methylation data were derived from Infinium MethylationEPIC arrays. Epigenetic subtyping and risk of progression to G-CIMP low were determined from random forest models and 7 specific CpGs (PMID: 29642018). *IDH1/2* status was determined with a glioma-tailored NGS panel. Overall survival (OS) was measured from date of randomization. **RESULTS:** Methylation analysis was performed on 654 tumors: 440 were *IDH1/2mt*, 204 *IDH1/2wt* and of 10 *IDH1/2* status was unknown; 8 *IDH1/2mt* were 1p/19q codeleted. Based on methylation, tumors were classified as G-CIMP high (n=409), G-CIMP low (n=19), codeletion-like (n=18), mesenchymal-like (n=107), classic-like (n=48), and PA-like tumors (n=53). Median OS between these epigenetic subtypes varied considerably: codeletion-like 9.1 yrs, G-CIMP high 9.5 yrs, G-CIMP low 2.8 yrs, mesenchymal-like 1.3 yrs, classic-like 1.6 yrs, and PA-like 2.8 yrs. The difference in OS of the *IDH1/2mt* astrocytoma subgroup patients was prominent [G-CIMP low vs G-CIMP high: HR 4.12, 95% CI 2.37-7.19, p < 0.001].

Within the *IDH1/2mt* G-CIMP high astrocytoma patients, 115 tumors were predicted to have risk of progression to G-CIMP low and patients with such tumors indeed had poorer survival [risk vs no-risk: HR 1.59, 95% CI 1.10-2.31, p = 0.02]. Median OS in G-CIMP high tumors with (n=37) and without (n=366) *CDKN2A/B* HD was 3.3 yrs versus not reached [p < 0.001], in G-CIMP low tumors it was 1.2 yrs (n=6) versus 4.4 yrs (n=12) [p=0.008]. **CONCLUSIONS:** In *IDH1/2mt* anaplastic astrocytoma, G-CIMP status and *CDKN2A/B* HD are of independent prognostic value.

### PATH-12. TEMOZOLOMIDE-INDUCED HYPERMUTATION IS ASSOCIATED WITH HIGH-GRADE TRANSFORMATION, DISTANT RECURRENCE AND REDUCED SURVIVAL IN INITIALLY LOW GRADE IDH-MUTANT GLIOMAS

Yao Yu<sup>1</sup>, Javier Villanueva-Meyer<sup>2</sup>, Susan Chang<sup>2</sup>, Matthew Grimmer<sup>2</sup>, Stephanie Hilz<sup>3</sup>, David Solomon<sup>2</sup>, Serah Choi<sup>4</sup>, Michael Wahl<sup>5</sup>, Tali Mazor<sup>6</sup>, Chibo Hong<sup>2</sup>, Anny Shai<sup>2</sup>, Joanna Phillips<sup>2</sup>, Michael McDermott<sup>2</sup>, Daphne Haas-Kogan<sup>7</sup>, Jennie Taylor<sup>8</sup>, Nicholas Butowski<sup>2</sup>, Jennifer Clarke<sup>8</sup>, Mitchel Berger<sup>2</sup>, Joseph Costello<sup>3</sup>, and Nancy Ann Oberheim Bush<sup>2</sup>; <sup>1</sup>Memorial Sloan Kettering, New York, NY, USA, <sup>2</sup>University of California San Francisco, San Francisco, CA, USA, <sup>3</sup>Department of Neurological Surgery, University of California San Francisco, San Francisco, CA, USA, <sup>4</sup>University Hospitals, Cleveland, OH, USA, <sup>5</sup>Samaritan Pastega Regional Cancer Center, Corvallis, OR, USA, <sup>6</sup>Dana Farber Cancer Center, Boston, MA, USA, <sup>7</sup>Dana-Farber Cancer Institute/Boston Children's Hospital, Boston, MA, USA, <sup>8</sup>Department of Neurological Surgery, University of California (UCSF), San Francisco, San Francisco, CA, USA

Temozolomide, a commonly used alkylating agent, can induce somatic hypermutation in gliomas. The prevalence and implications of this phenomenon are not well characterized. Using targeted and whole exome sequencing from a cohort of 82 patients with recurrent *IDH*-mut LGG, we evaluated the clinical implications of hypermutation. Hypermutation was identified at transformation in 57% of recurrent gliomas exposed to TMZ and occurred for both *IDH*-mutant astrocytomas (52%) and oligodendrogliomas (64%). Among astrocytomas, receipt of radiotherapy prior to transformation was associated with decreased risk of hypermutation (11% vs 70%, p=0.0052), but this trend was not observed for oligodendrogliomas (78% vs 54%, p=NS). Among hypermutated tumors, 94% were transformed to higher WHO grades. Hypermutation was associated with transformation to higher WHO grade (OR 12.0 95% CI 2.5-115.5, p=0.002) and shorter survival after transformation (HR 2.1, 95% CI 1.1-4.0, p=0.018) compared with non-hypermutated transformed tumors. It remained prognostic (controlling for grade, molecular subtype, age, and prior radiotherapy. Patients with transformation to glioblastoma had poor survival regardless of hypermutation (p=0.78). Multivariate models were validated using an external, independent dataset (Harrel's C=0.72). Strikingly, hypermutated tumors were also associated with development of discontinuous disease after transformation (3-year CI 41% vs 8% p=0.005), including ependymal and leptomeningeal distributions and four cases of spinal dissemination that were not observed in non-hypermutated tumors. These data have significant implications for management of *IDH*-mut LGG at recurrence.

### PATH-13. CHARACTERIZING TEMPORAL GENOMIC HETEROGENEITY IN PEDIATRIC LOW-GRADE GLIOMAS

Margot Lazow<sup>1</sup>, Austin Schaffer<sup>1</sup>, Lindsey Hoffman<sup>2</sup>, Diana Osorio<sup>3</sup>, Daniel Boue<sup>3</sup>, Sarah Rush<sup>4</sup>, Erin Wright<sup>4</sup>, Adam Lane<sup>5</sup>, Mariko DeWire<sup>5</sup>, Teresa Smolarek<sup>5</sup>, Jared Sipple<sup>1</sup>, Heather Taggart<sup>1</sup>, Jaime Reuss<sup>1</sup>, Ralph Salloum<sup>5</sup>, Trent Hummel<sup>5</sup>, Peter de Blank<sup>5</sup>, Natasha Pillay-Smiley<sup>5</sup>, Mary Sutton<sup>5</sup>, Anthony Asher<sup>1</sup>, Charles Stevenson<sup>5</sup>, Rachid Drissi<sup>5</sup>, Jonathan Finlay<sup>6</sup>, Maryam Fouladi<sup>5</sup>, and Christine Fuller<sup>5</sup>; <sup>1</sup>Cincinnati Children's Hospital Medical Center, Cincinnati, OH, USA, <sup>2</sup>Phoenix Children's Hospital, Phoenix, AZ, USA, <sup>3</sup>Nationwide Children's Hospital; The Ohio State University College of Medicine, Columbus, OH, USA, <sup>4</sup>Akron Children's Hospital, Akron, OH, USA, <sup>5</sup>Cincinnati Children's Hospital Medical Center and University of Cincinnati College of Medicine, Cincinnati, OH, USA, <sup>6</sup>Nationwide Children's Hospital; The Ohio State University College of Medicine, Columbus, OH, USA

**BACKGROUND:** Recent discoveries have provided valuable insight into the genomic landscape of pediatric low-grade gliomas (LGGs) at diagnosis, facilitating molecularly targeted treatment. However, little is known about their temporal and therapy-related genomic heterogeneity. An adequate understanding of the evolution of pediatric LGGs' genomic profiles over time is critically important in guiding decisions about targeted therapeutics and diagnostic biopsy at recurrence. **METHODS:** Fluorescence *in situ* hybridization, mutation-specific immunohistochemistry, exome analyses, and/or targeted sequencing were performed on paired tumor samples from diagnostic and subsequent surgeries. **RESULTS:** Ninety-four tumor samples from 45 patients (41 with two specimens, four with three specimens) from three institutions underwent testing. Conservation of *BRAF* fusion,
